# Supplementary material for: A Geospatial Analysis for Thriving Agricultural Sector at the Koyra Upazila, Khulna, Bangladesh by Identifying Suitable Rainwater Harvesting Structure Site Integrating SCS-CN
Source: Research Square preprint supplement (doi:10.21203/rs.3.rs-6857794/v1), 2025-10-27
Supplement: Supplementary file 1 [file 2b9312a9c3d61a3165625bf6.xlsx]

## Sheet: CN
FID	WS	HSG	LULC	AREA (KM2)	CN
1	WS 1	A	Bare Land	0.000857	88
2	WS 1	A	Buildup Area	3.32638	89
3	WS 1	A	Crop Land	15.0316	67
4	WS 1	A	Range Land	0.014432	30
5	WS 1	A	Vegetation	1.06378	36
6	WS 1	A	Water	2.65587	99
7	WS 2	A	Bare Land	0.000526	88
8	WS 2	A	Buildup Area	1.09678	89
9	WS 2	A	Crop Land	5.5907	67
10	WS 2	A	Flooded Vegetation	0.003251	72
11	WS 2	A	Range Land	0.01032	30
12	WS 2	A	Vegetation	0.503924	36
13	WS 2	A	Water	4.40825	99
14	WS 3	A	Bare Land	0.002501	88
15	WS 3	A	Buildup Area	2.38852	89
16	WS 3	A	Crop Land	15.677	67
17	WS 3	A	Flooded Vegetation	0.000478	72
18	WS 3	A	Range Land	0.009174	30
19	WS 3	A	Vegetation	0.276141	36
20	WS 3	A	Water	7.35043	99
21	WS 4	A	Buildup Area	0.024415	89
22	WS 4	A	Crop Land	0.156973	67
23	WS 4	A	Water	0.12815	99
24	WS 5	A	Bare Land	0.002646	88
25	WS 5	A	Buildup Area	2.27915	89
26	WS 5	A	Crop Land	22.8293	67
27	WS 5	A	Range Land	0.046956	30
28	WS 5	A	Vegetation	0.254356	36
29	WS 5	A	Water	2.23244	99
30	WS 6	A	Bare Land	0.0001	88
31	WS 6	A	Buildup Area	0.442983	89
32	WS 6	A	Crop Land	2.20682	67
33	WS 6	A	Range Land	0.014878	30
34	WS 6	A	Water	3.32409	99
35	WS 7	A	Bare Land	0.070736	88
36	WS 7	A	Buildup Area	3.05341	89
37	WS 7	A	Crop Land	11.1307	67
38	WS 7	A	Flooded Vegetation	0.004775	72
39	WS 7	A	Range Land	0.108654	30
40	WS 7	A	Vegetation	0.019494	36
41	WS 7	A	Water	6.39744	99
42	WS 8	A	Bare Land	6.8e-05	88
43	WS 8	A	Buildup Area	2.58862	89
44	WS 8	A	Crop Land	8.26596	67
45	WS 8	A	Vegetation	0.038077	36
46	WS 8	A	Water	0.529522	99

## Sheet: CN_Calculation
Row Level	Approx CN
Ws1	72.6432
Ws2	79.8483
Ws3	77.851
Ws4	81.9834
Ws5	71.0518
Ws6	86.2971
Ws7	79.9312
Ws8	73.3661

## Sheet: Rainfall Data
Year	Month	date	rainfall in mm
2022	6	1	2.37
2022	6	2	1.03
2022	6	3	2.72
2022	6	4	3.54
2022	6	5	0.89
2022	6	6	1.44
2022	6	7	0.07
2022	6	8	0.08
2022	6	9	8.85
2022	6	10	7.03
2022	6	11	3.54
2022	6	12	0.02
2022	6	13	0.6
2022	6	14	3.72
2022	6	15	3.67
2022	6	16	8.24
2022	6	17	12.76
2022	6	18	14.23
2022	6	19	12.31
2022	6	20	11.01
2022	6	21	10.71
2022	6	22	11.96
2022	6	23	3.57
2022	6	24	6.53
2022	6	25	6.63
2022	6	26	4.83
2022	6	27	2.23
2022	6	28	6.19
2022	6	29	8.25
2022	6	30	9.27
			168.29

## Sheet: WS1
Water shed no.	Approx. CN
WS 1	73
	Year	Month	date	rainfall in mm	cc(5 days)	AMC	CONDITIONAL CN	s	S*.2	S*.8	P-.2S	SQ(P-.2S)	P+S0.8	Q
	2022	6	1	2.37	0	I	34	739.588	147.918	591.671	-147.918	21879.6	591.671	36.9794
	2022	6	2	1.03	0	I	34	739.588	147.918	591.671	-147.918	21879.6	591.671	36.9794
	2022	6	3	2.72	0	I	34	739.588	147.918	591.671	-147.918	21879.6	591.671	36.9794
	2022	6	4	3.54	0	I	34	739.588	147.918	591.671	-147.918	21879.6	591.671	36.9794
	2022	6	5	0.89	10.55	I	34	739.588	147.918	591.671	-137.368	18869.9	602.221	31.3338
	2022	6	6	1.44	9.62	I	34	739.588	147.918	591.671	-138.298	19126.2	601.291	31.8086
	2022	6	7	0.07	8.66	I	34	739.588	147.918	591.671	-139.258	19392.7	600.331	32.3034
	2022	6	8	0.08	6.02	I	34	739.588	147.918	591.671	-141.898	20134.9	597.691	33.6879
	2022	6	9	8.85	11.33	I	34	739.588	147.918	591.671	-136.588	18656.2	603.001	30.9389
	2022	6	10	7.03	17.47	I	34	739.588	147.918	591.671	-130.448	17016.6	609.141	27.9354
	2022	6	11	3.54	19.57	I	34	739.588	147.918	591.671	-128.348	16473.1	611.241	26.9503
	2022	6	12	0.02	19.52	I	34	739.588	147.918	591.671	-128.398	16486	611.191	26.9735
	2022	6	13	0.6	20.04	I	34	739.588	147.918	591.671	-127.878	16352.7	611.711	26.7327
	2022	6	14	3.72	14.91	I	34	739.588	147.918	591.671	-133.008	17691	606.581	29.1652
	2022	6	15	3.67	11.55	I	34	739.588	147.918	591.671	-136.368	18596.1	603.221	30.8281
	2022	6	16	8.24	16.25	I	34	739.588	147.918	591.671	-131.668	17336.4	607.921	28.5175
	2022	6	17	12.76	28.99	I	34	739.588	147.918	591.671	-118.928	14143.8	620.661	22.7883
	2022	6	18	14.23	42.62	II	54	465.667	93.1333	372.533	-50.5133	2551.6	415.153	6.14616
	2022	6	19	12.31	51.21	II	54	465.667	93.1333	372.533	-41.9233	1757.57	423.743	4.14771
	2022	6	20	11.01	58.55	III	73	344.466	68.8932	275.573	-10.3432	106.981	334.123	0.320184
	2022	6	21	10.71	61.02	III	73	344.466	68.8932	275.573	-7.87315	61.9865	336.593	0.184159
	2022	6	22	11.96	60.22	III	73	344.466	68.8932	275.573	-8.67315	75.2235	335.793	0.224018
	2022	6	23	3.57	49.56	II	54	465.667	93.1333	372.533	-43.5733	1898.64	422.093	4.49814
	2022	6	24	6.53	43.78	II	54	465.667	93.1333	372.533	-49.3533	2435.75	416.313	5.85077
	2022	6	25	6.63	39.4	II	54	465.667	93.1333	372.533	-53.7333	2887.27	411.933	7.00907
	2022	6	26	4.83	33.52	I	34	739.588	147.918	591.671	-114.398	13086.8	625.191	20.9325
	2022	6	27	2.23	23.79	I	34	739.588	147.918	591.671	-124.128	15407.7	615.461	25.0344
	2022	6	28	6.19	26.41	I	34	739.588	147.918	591.671	-121.508	14764.1	618.081	23.887
	2022	6	29	8.25	28.13	I	34	739.588	147.918	591.671	-119.788	14349.1	619.801	23.1511
	2022	6	30	9.27	30.77	I	34	739.588	147.918	591.671	-117.148	13723.6	622.441	22.048
														671.315

## Sheet: WS 2
Water shed no.	Approx. CN
WS 1	80
	Year	Month	rainfall in mm	date	cc(5 days)	AMC	CONDITIONAL CN	s	S*.2	S*.8	P-.25	SQ(P-.25)	P+S0.8	Q
	2022	6	1	2.37	0	I	63	399.143	79.8286	319.314	-79.8286	6372.6	319.314	19.9571		63
	2022	6	2	1.03	0	I	63	399.143	79.8286	319.314	-79.8286	6372.6	319.314	19.9571		80
	2022	6	3	2.72	0	I	63	399.143	79.8286	319.314	-79.8286	6372.6	319.314	19.9571		91
	2022	6	4	3.54	0	I	63	399.143	79.8286	319.314	-79.8286	6372.6	319.314	19.9571
	2022	6	5	0.89	10.55	I	63	399.143	79.8286	319.314	-69.2786	4799.52	329.864	14.55
	2022	6	6	1.44	9.62	I	63	399.143	79.8286	319.314	-70.2086	4929.24	328.934	14.9855
	2022	6	7	0.07	8.66	I	63	399.143	79.8286	319.314	-71.1686	5064.97	327.974	15.4432
	2022	6	8	0.08	6.02	I	63	399.143	79.8286	319.314	-73.8086	5447.71	325.334	16.7449
	2022	6	9	8.85	11.33	I	63	399.143	79.8286	319.314	-68.4986	4692.05	330.644	14.1906
	2022	6	10	7.03	17.47	I	63	399.143	79.8286	319.314	-62.3586	3888.59	336.784	11.5462
	2022	6	11	3.54	19.57	I	63	399.143	79.8286	319.314	-60.2586	3631.1	338.884	10.7149
	2022	6	12	0.02	19.52	I	63	399.143	79.8286	319.314	-60.3086	3637.12	338.834	10.7342
	2022	6	13	0.6	20.04	I	63	399.143	79.8286	319.314	-59.7886	3574.67	339.354	10.5338
	2022	6	14	3.72	14.91	I	63	399.143	79.8286	319.314	-64.9186	4214.42	334.224	12.6096
	2022	6	15	3.67	11.55	I	63	399.143	79.8286	319.314	-68.2786	4661.96	330.864	14.0903
	2022	6	16	8.24	16.25	I	63	399.143	79.8286	319.314	-63.5786	4042.23	335.564	12.0461
	2022	6	17	12.76	28.99	I	63	399.143	79.8286	319.314	-50.8386	2584.56	348.304	7.42041
	2022	6	18	14.23	42.62	II	80	314.325	62.865	251.46	-20.245	409.86	294.08	1.3937
	2022	6	19	12.31	51.21	II	80	314.325	62.865	251.46	-11.655	135.839	302.67	0.448802
	2022	6	20	11.01	58.55	III	91	276.33	55.2659	221.064	3.28407	10.7851	279.614	0.0385714
	2022	6	21	10.71	61.02	III	91	276.33	55.2659	221.064	5.75407	33.1093	282.084	0.117374
	2022	6	22	11.96	60.22	III	91	276.33	55.2659	221.064	4.95407	24.5428	281.284	0.0872527
	2022	6	23	3.57	49.56	II	80	314.325	62.865	251.46	-13.305	177.023	301.02	0.588077
	2022	6	24	6.53	43.78	II	80	314.325	62.865	251.46	-19.085	364.237	295.24	1.2337
	2022	6	25	6.63	39.4	II	80	314.325	62.865	251.46	-23.465	550.606	290.86	1.89303
	2022	6	26	4.83	33.52	I	63	399.143	79.8286	319.314	-46.3086	2144.48	352.834	6.07788
	2022	6	27	2.23	23.79	I	63	399.143	79.8286	319.314	-56.0386	3140.32	343.104	9.15267
	2022	6	28	6.19	26.41	I	63	399.143	79.8286	319.314	-53.4186	2853.54	345.724	8.25381
	2022	6	29	8.25	28.13	I	63	399.143	79.8286	319.314	-51.6986	2672.74	347.444	7.69258
	2022	6	30	9.27	30.77	I	63	399.143	79.8286	319.314	-49.0586	2406.74	350.084	6.87475
														289.29

## Sheet: WS 3
Water shed no.	Approx. CN
WS 1	78
	Year	Month	rainfall in mm	date	cc(5 days)	AMC	CONDITIONAL CN	s	S*.2	S*.8	P-.25	SQ(P-.25)	P+S0.8	Q
	2022	6	1	2.37	0	I	60	419.1	83.82	335.28	-83.82	7025.79	335.28	20.955
	2022	6	2	1.03	0	I	60	419.1	83.82	335.28	-83.82	7025.79	335.28	20.955		60
	2022	6	3	2.72	0	I	60	419.1	83.82	335.28	-83.82	7025.79	335.28	20.955		78
	2022	6	4	3.54	0	I	60	419.1	83.82	335.28	-83.82	7025.79	335.28	20.955		90
	2022	6	5	0.89	10.55	I	60	419.1	83.82	335.28	-73.27	5368.49	345.83	15.5235
	2022	6	6	1.44	9.62	I	60	419.1	83.82	335.28	-74.2	5505.64	344.9	15.963
	2022	6	7	0.07	8.66	I	60	419.1	83.82	335.28	-75.16	5649.03	343.94	16.4245
	2022	6	8	0.08	6.02	I	60	419.1	83.82	335.28	-77.8	6052.84	341.3	17.7347
	2022	6	9	8.85	11.33	I	60	419.1	83.82	335.28	-72.49	5254.8	346.61	15.1606
	2022	6	10	7.03	17.47	I	60	419.1	83.82	335.28	-66.35	4402.32	352.75	12.48
	2022	6	11	3.54	19.57	I	60	419.1	83.82	335.28	-64.25	4128.06	354.85	11.6333
	2022	6	12	0.02	19.52	I	60	419.1	83.82	335.28	-64.3	4134.49	354.8	11.653
	2022	6	13	0.6	20.04	I	60	419.1	83.82	335.28	-63.78	4067.89	355.32	11.4485
	2022	6	14	3.72	14.91	I	60	419.1	83.82	335.28	-68.91	4748.59	350.19	13.56
	2022	6	15	3.67	11.55	I	60	419.1	83.82	335.28	-72.27	5222.95	346.83	15.0591
	2022	6	16	8.24	16.25	I	60	419.1	83.82	335.28	-67.57	4565.7	351.53	12.9881
	2022	6	17	12.76	28.99	I	60	419.1	83.82	335.28	-54.83	3006.33	364.27	8.25302
	2022	6	18	14.23	42.62	II	78	322.385	64.4769	257.908	-21.8569	477.725	300.528	1.58962
	2022	6	19	12.31	51.21	II	78	322.385	64.4769	257.908	-13.2669	176.011	309.118	0.569399
	2022	6	20	11.01	58.55	III	90	279.4	55.88	223.52	2.67	7.1289	282.07	0.0252735
	2022	6	21	10.71	61.02	III	90	279.4	55.88	223.52	5.14	26.4196	284.54	0.0928502
	2022	6	22	11.96	60.22	III	90	279.4	55.88	223.52	4.34	18.8356	283.74	0.0663833
	2022	6	23	3.57	49.56	II	78	322.385	64.4769	257.908	-14.9169	222.515	307.468	0.723701
	2022	6	24	6.53	43.78	II	78	322.385	64.4769	257.908	-20.6969	428.363	301.688	1.41989
	2022	6	25	6.63	39.4	II	78	322.385	64.4769	257.908	-25.0769	628.852	297.308	2.11516
	2022	6	26	4.83	33.52	I	60	419.1	83.82	335.28	-50.3	2530.09	368.8	6.86033
	2022	6	27	2.23	23.79	I	60	419.1	83.82	335.28	-60.03	3603.6	359.07	10.0359
	2022	6	28	6.19	26.41	I	60	419.1	83.82	335.28	-57.41	3295.91	361.69	9.11252
	2022	6	29	8.25	28.13	I	60	419.1	83.82	335.28	-55.69	3101.38	363.41	8.5341
	2022	6	30	9.27	30.77	I	60	419.1	83.82	335.28	-53.05	2814.3	366.05	7.6883
														310.535

## Sheet: WS 4
Water shed no.	Approx. CN
WS 1	82
	Year	Month	rainfall in mm	date	cc(5 days)	AMC	CONDITIONAL CN	s	S*.2	S*.8	P-.25	SQ(P-.25)	P+S0.8	Q
	2022	6	1	2.37	0	I	66	381	76.2	304.8	-76.2	5806.44	304.8	19.05
	2022	6	2	1.03	0	I	66	381	76.2	304.8	-76.2	5806.44	304.8	19.05
	2022	6	3	2.72	0	I	66	381	76.2	304.8	-76.2	5806.44	304.8	19.05
	2022	6	4	3.54	0	I	66	381	76.2	304.8	-76.2	5806.44	304.8	19.05
	2022	6	5	0.89	10.55	I	66	381	76.2	304.8	-65.65	4309.92	315.35	13.6671
	2022	6	6	1.44	9.62	I	66	381	76.2	304.8	-66.58	4432.9	314.42	14.0986			66
	2022	6	7	0.07	8.66	I	66	381	76.2	304.8	-67.54	4561.65	313.46	14.5526			82
	2022	6	8	0.08	6.02	I	66	381	76.2	304.8	-70.18	4925.23	310.82	15.8459			92
	2022	6	9	8.85	11.33	I	66	381	76.2	304.8	-64.87	4208.12	316.13	13.3113
	2022	6	10	7.03	17.47	I	66	381	76.2	304.8	-58.73	3449.21	322.27	10.7029
	2022	6	11	3.54	19.57	I	66	381	76.2	304.8	-56.63	3206.96	324.37	9.88672
	2022	6	12	0.02	19.52	I	66	381	76.2	304.8	-56.68	3212.62	324.32	9.90572
	2022	6	13	0.6	20.04	I	66	381	76.2	304.8	-56.16	3153.95	324.84	9.70923
	2022	6	14	3.72	14.91	I	66	381	76.2	304.8	-61.29	3756.46	319.71	11.7496
	2022	6	15	3.67	11.55	I	66	381	76.2	304.8	-64.65	4179.62	316.35	13.212
	2022	6	16	8.24	16.25	I	66	381	76.2	304.8	-59.95	3594	321.05	11.1945
	2022	6	17	12.76	28.99	I	66	381	76.2	304.8	-47.21	2228.78	333.79	6.6772
	2022	6	18	14.23	42.62	II	82	306.659	61.3317	245.327	-18.7117	350.128	287.947	1.21595
	2022	6	19	12.31	51.21	II	82	306.659	61.3317	245.327	-10.1217	102.449	296.537	0.345485
	2022	6	20	11.01	58.55	III	92	273.326	54.6652	218.661	3.88478	15.0915	277.211	0.0544406
	2022	6	21	10.71	61.02	III	92	273.326	54.6652	218.661	6.35478	40.3833	279.681	0.144391
	2022	6	22	11.96	60.22	III	92	273.326	54.6652	218.661	5.55478	30.8556	278.881	0.110641
	2022	6	23	3.57	49.56	II	82	306.659	61.3317	245.327	-11.7717	138.573	294.887	0.46992
	2022	6	24	6.53	43.78	II	82	306.659	61.3317	245.327	-17.5517	308.062	289.107	1.06557
	2022	6	25	6.63	39.4	II	82	306.659	61.3317	245.327	-21.9317	481	284.727	1.68934
	2022	6	26	4.83	33.52	I	66	381	76.2	304.8	-42.68	1821.58	338.32	5.3842
	2022	6	27	2.23	23.79	I	66	381	76.2	304.8	-52.41	2746.81	328.59	8.35938
	2022	6	28	6.19	26.41	I	66	381	76.2	304.8	-49.79	2479.04	331.21	7.48481
	2022	6	29	8.25	28.13	I	66	381	76.2	304.8	-48.07	2310.72	332.93	6.94057
	2022	6	30	9.27	30.77	I	66	381	76.2	304.8	-45.43	2063.88	335.57	6.15039
														270.129

## Sheet: WS5
Water shed no.	Approx. CN
WS 1	71
	Year	Month	rainfall in mm	date	cc(5 days)	AMC	CONDITIONAL CN	s	S*.2	S*.8	P-.25	SQ(P-.25)	P+S0.8	Q
	2022	6	1	2.37	0	I	32	785.812	157.163	628.65	-157.163	24700.1	628.65	39.2906
	2022	6	2	1.03	0	I	32	785.812	157.163	628.65	-157.163	24700.1	628.65	39.2906
	2022	6	3	2.72	0	I	32	785.812	157.163	628.65	-157.163	24700.1	628.65	39.2906
	2022	6	4	3.54	0	I	32	785.812	157.163	628.65	-157.163	24700.1	628.65	39.2906
	2022	6	5	0.89	10.55	I	32	785.812	157.163	628.65	-146.613	21495.2	639.2	33.6283
	2022	6	6	1.44	9.62	I	32	785.812	157.163	628.65	-147.543	21768.8	638.27	34.1059
	2022	6	7	0.07	8.66	I	32	785.812	157.163	628.65	-148.503	22053	637.31	34.6032
	2022	6	8	0.08	6.02	I	32	785.812	157.163	628.65	-151.143	22844.1	634.67	35.9936
	2022	6	9	8.85	11.33	I	32	785.812	157.163	628.65	-145.833	21267.1	639.98	33.2309			32
	2022	6	10	7.03	17.47	I	32	785.812	157.163	628.65	-139.693	19514	646.12	30.2018			52
	2022	6	11	3.54	19.57	I	32	785.812	157.163	628.65	-137.593	18931.7	648.22	29.2057			71
	2022	6	12	0.02	19.52	I	32	785.812	157.163	628.65	-137.643	18945.5	648.17	29.2291
	2022	6	13	0.6	20.04	I	32	785.812	157.163	628.65	-137.123	18802.6	648.69	28.9855
	2022	6	14	3.72	14.91	I	32	785.812	157.163	628.65	-142.253	20235.8	643.56	31.4435
	2022	6	15	3.67	11.55	I	32	785.812	157.163	628.65	-145.613	21203	640.2	33.1193
	2022	6	16	8.24	16.25	I	32	785.812	157.163	628.65	-140.913	19856.3	644.9	30.7898
	2022	6	17	12.76	28.99	I	32	785.812	157.163	628.65	-128.173	16428.2	657.64	24.9805
	2022	6	18	14.23	42.62	II	52	483.577	96.7154	386.862	-54.0954	2926.31	429.482	6.81359
	2022	6	19	12.31	51.21	II	52	483.577	96.7154	386.862	-45.5054	2070.74	438.072	4.72694
	2022	6	20	11.01	58.55	III	71	354.169	70.8338	283.335	-12.2838	150.892	341.885	0.441352
	2022	6	21	10.71	61.02	III	71	354.169	70.8338	283.335	-9.8138	96.3107	344.355	0.279684
	2022	6	22	11.96	60.22	III	71	354.169	70.8338	283.335	-10.6138	112.653	343.555	0.327903
	2022	6	23	3.57	49.56	II	52	483.577	96.7154	386.862	-47.1554	2223.63	436.422	5.09514
	2022	6	24	6.53	43.78	II	52	483.577	96.7154	386.862	-52.9354	2802.15	430.642	6.50693
	2022	6	25	6.63	39.4	II	52	483.577	96.7154	386.862	-57.3154	3285.05	426.262	7.70666
	2022	6	26	4.83	33.52	I	32	785.812	157.163	628.65	-123.643	15287.5	662.17	23.0869
	2022	6	27	2.23	23.79	I	32	785.812	157.163	628.65	-133.373	17788.2	652.44	27.2642
	2022	6	28	6.19	26.41	I	32	785.812	157.163	628.65	-130.753	17096.2	655.06	26.0987
	2022	6	29	8.25	28.13	I	32	785.812	157.163	628.65	-129.033	16649.4	656.78	25.35
	2022	6	30	9.27	30.77	I	32	785.812	157.163	628.65	-126.393	15975.1	659.42	24.2259
														724.604

## Sheet: WS 6
Water shed no.	Approx. CN
WS 1	86
	Year	Month	rainfall in mm	date	cc(5 days)	AMC	CONDITIONAL CN	s	S*.2	S*.8	P-.25	SQ(P-.25)	P+S0.8	Q
	2022	6	1	2.37	0	I	72	349.25	69.85	279.4	-69.85	4879.02	279.4	17.4625
	2022	6	2	1.03	0	I	72	349.25	69.85	279.4	-69.85	4879.02	279.4	17.4625
	2022	6	3	2.72	0	I	72	349.25	69.85	279.4	-69.85	4879.02	279.4	17.4625
	2022	6	4	3.54	0	I	72	349.25	69.85	279.4	-69.85	4879.02	279.4	17.4625
	2022	6	5	0.89	10.55	I	72	349.25	69.85	279.4	-59.3	3516.49	289.95	12.1279
	2022	6	6	1.44	9.62	I	72	349.25	69.85	279.4	-60.23	3627.65	289.02	12.5516
	2022	6	7	0.07	8.66	I	72	349.25	69.85	279.4	-61.19	3744.22	288.06	12.998
	2022	6	8	0.08	6.02	I	72	349.25	69.85	279.4	-63.83	4074.27	285.42	14.2746		72
	2022	6	9	8.85	11.33	I	72	349.25	69.85	279.4	-58.52	3424.59	290.73	11.7793		86
	2022	6	10	7.03	17.47	I	72	349.25	69.85	279.4	-52.38	2743.66	296.87	9.24197		92
	2022	6	11	3.54	19.57	I	72	349.25	69.85	279.4	-50.28	2528.08	298.97	8.45596
	2022	6	12	0.02	19.52	I	72	349.25	69.85	279.4	-50.33	2533.11	298.92	8.4742
	2022	6	13	0.6	20.04	I	72	349.25	69.85	279.4	-49.81	2481.04	299.44	8.28559
	2022	6	14	3.72	14.91	I	72	349.25	69.85	279.4	-54.94	3018.4	294.31	10.2559
	2022	6	15	3.67	11.55	I	72	349.25	69.85	279.4	-58.3	3398.89	290.95	11.682
	2022	6	16	8.24	16.25	I	72	349.25	69.85	279.4	-53.6	2872.96	295.65	9.71744
	2022	6	17	12.76	28.99	I	72	349.25	69.85	279.4	-40.86	1669.54	308.39	5.41373
	2022	6	18	14.23	42.62	II	86	292.395	58.4791	233.916	-15.8591	251.51	276.536	0.909501
	2022	6	19	12.31	51.21	II	86	292.395	58.4791	233.916	-7.26907	52.8394	285.126	0.185319
	2022	6	20	11.01	58.55	III	92	273.326	54.6652	218.661	3.88478	15.0915	277.211	0.0544406
	2022	6	21	10.71	61.02	III	92	273.326	54.6652	218.661	6.35478	40.3833	279.681	0.144391
	2022	6	22	11.96	60.22	III	92	273.326	54.6652	218.661	5.55478	30.8556	278.881	0.110641
	2022	6	23	3.57	49.56	II	86	292.395	58.4791	233.916	-8.91907	79.5498	283.476	0.280622
	2022	6	24	6.53	43.78	II	86	292.395	58.4791	233.916	-14.6991	216.063	277.696	0.778054
	2022	6	25	6.63	39.4	II	86	292.395	58.4791	233.916	-19.0791	364.011	273.316	1.33183
	2022	6	26	4.83	33.52	I	72	349.25	69.85	279.4	-36.33	1319.87	312.92	4.21791
	2022	6	27	2.23	23.79	I	72	349.25	69.85	279.4	-46.06	2121.52	303.19	6.99734
	2022	6	28	6.19	26.41	I	72	349.25	69.85	279.4	-43.44	1887.03	305.81	6.17061
	2022	6	29	8.25	28.13	I	72	349.25	69.85	279.4	-41.72	1740.56	307.53	5.6598
	2022	6	30	9.27	30.77	I	72	349.25	69.85	279.4	-39.08	1527.25	310.17	4.9239
														236.873

## Sheet: WS7
Water shed no.	Approx. CN
WS 1	80
	Year	Month	rainfall in mm	date	cc(5 days)	AMC	CONDITIONAL CN	s	S*.2	S*.8	P-.25	SQ(P-.25)	P+S0.8	Q
	2022	6	1	2.37	0	I	63	399.143	79.8286	319.314	-79.8286	6372.6	319.314	19.9571
	2022	6	2	1.03	0	I	63	399.143	79.8286	319.314	-79.8286	6372.6	319.314	19.9571
	2022	6	3	2.72	0	I	63	399.143	79.8286	319.314	-79.8286	6372.6	319.314	19.9571
	2022	6	4	3.54	0	I	63	399.143	79.8286	319.314	-79.8286	6372.6	319.314	19.9571
	2022	6	5	0.89	10.55	I	63	399.143	79.8286	319.314	-69.2786	4799.52	329.864	14.55
	2022	6	6	1.44	9.62	I	63	399.143	79.8286	319.314	-70.2086	4929.24	328.934	14.9855	63
	2022	6	7	0.07	8.66	I	63	399.143	79.8286	319.314	-71.1686	5064.97	327.974	15.4432	80
	2022	6	8	0.08	6.02	I	63	399.143	79.8286	319.314	-73.8086	5447.71	325.334	16.7449	91
	2022	6	9	8.85	11.33	I	63	399.143	79.8286	319.314	-68.4986	4692.05	330.644	14.1906
	2022	6	10	7.03	17.47	I	63	399.143	79.8286	319.314	-62.3586	3888.59	336.784	11.5462
	2022	6	11	3.54	19.57	I	63	399.143	79.8286	319.314	-60.2586	3631.1	338.884	10.7149
	2022	6	12	0.02	19.52	I	63	399.143	79.8286	319.314	-60.3086	3637.12	338.834	10.7342
	2022	6	13	0.6	20.04	I	63	399.143	79.8286	319.314	-59.7886	3574.67	339.354	10.5338
	2022	6	14	3.72	14.91	I	63	399.143	79.8286	319.314	-64.9186	4214.42	334.224	12.6096
	2022	6	15	3.67	11.55	I	63	399.143	79.8286	319.314	-68.2786	4661.96	330.864	14.0903
	2022	6	16	8.24	16.25	I	63	399.143	79.8286	319.314	-63.5786	4042.23	335.564	12.0461
	2022	6	17	12.76	28.99	I	63	399.143	79.8286	319.314	-50.8386	2584.56	348.304	7.42041
	2022	6	18	14.23	42.62	II	80	314.325	62.865	251.46	-20.245	409.86	294.08	1.3937
	2022	6	19	12.31	51.21	II	80	314.325	62.865	251.46	-11.655	135.839	302.67	0.448802
	2022	6	20	11.01	58.55	III	91	276.33	55.2659	221.064	3.28407	10.7851	279.614	0.0385714
	2022	6	21	10.71	61.02	III	91	276.33	55.2659	221.064	5.75407	33.1093	282.084	0.117374
	2022	6	22	11.96	60.22	III	91	276.33	55.2659	221.064	4.95407	24.5428	281.284	0.0872527
	2022	6	23	3.57	49.56	II	80	314.325	62.865	251.46	-13.305	177.023	301.02	0.588077
	2022	6	24	6.53	43.78	II	80	314.325	62.865	251.46	-19.085	364.237	295.24	1.2337
	2022	6	25	6.63	39.4	II	80	314.325	62.865	251.46	-23.465	550.606	290.86	1.89303
	2022	6	26	4.83	33.52	I	63	399.143	79.8286	319.314	-46.3086	2144.48	352.834	6.07788
	2022	6	27	2.23	23.79	I	63	399.143	79.8286	319.314	-56.0386	3140.32	343.104	9.15267
	2022	6	28	6.19	26.41	I	63	399.143	79.8286	319.314	-53.4186	2853.54	345.724	8.25381
	2022	6	29	8.25	28.13	I	63	399.143	79.8286	319.314	-51.6986	2672.74	347.444	7.69258
	2022	6	30	9.27	30.77	I	63	399.143	79.8286	319.314	-49.0586	2406.74	350.084	6.87475
														289.29

[truncated: 2 more sheets: WS 8, Weighted Calculation]
