# Supplementary material for: A Geospatial Analysis for Thriving Agricultural Sector at the Koyra Upazila, Khulna, Bangladesh by Identifying Suitable Rainwater Harvesting Structure Site Integrating SCS-CN
Source: Research Square preprint supplement (doi:10.21203/rs.3.rs-6857794/v1), 2025-10-27
Supplement: Supplementary file 2 [file ab2318271c0070a87de852eb.xlsx]

## Sheet: Sheet1
					Site	Area (m2)	Max depth (m)	Volume (m3)	Watershed	Category
					Site 1	34646.3	3.6	124727	WS 1	Suitable
					Site 2	21189.8	3.4	72045.1	WS 1	Suitable
					Site 3	400190	4.4	1.76084e+06	WS 1	Suitable		2.82142e+06
					Site 4	61245.2	3.1	189860	WS 1	Suitable
					Site 5	217402	3.1	673948	WS 1	Suitable
					Site 6	75250.3	2	150501	WS 3	Not Suitable
					Site 7	39811.2	2.5	99527.9	WS 5	Not Suitable
					Site 8	73147	3.5	256015	WS 4	Not Suitable
					Site 9	199990	5	999949	WS 6	Moderately Suitable
					Site 10	208726	2.6	542687	WS 6	Suitable
					Site 11	73599.1	7.2	529914	WS 6	Not Suitable
					Site 12	91252.9	2.5	228132	WS 6	Moderately Suitable
					Site 13	102793	5.2	534524	WS 6	Moderately Suitable			3.54085e+06
					Site 14	201613	3.5	705646	WS 6	Not Suitable		160418
					Site 15	35428.2	2.6	92113.2	WS7	Not Suitable
					Site 16	34152.2	2	68304.5	WS7	Suitable
					Site 17	107787	4	431147	WS8	Suitable

## Sheet: Sheet2
			Watershed	CN	Q	AREA OF WATERSHED	TOTAL AREA OF BASIN	W	Area
			Ws1	73	671.315	22.0929	125.562	118.12	2.20929e+06	0.671315	1.48313e+06
			Ws2	80	289.29	11.6138	125.562	26.7578	1.16138e+06	0.28929	335975
			Ws3	78	310.535	25.7042	125.562	63.5709	2.57042e+06	0.310535	798206
			Ws4	82	270.129	0.309538	125.562	0.665929	30953.8	0.270129	8361.51
			Ws5	71	724.604	27.6449	125.562	159.536	2.76449e+06	0.724604	2.00316e+06
			Ws6	86	236.873	5.98887	125.562	11.298	598887	0.236873	141860
			Ws7	80	289.29	20.7852	125.562	47.8884	2078517	0.28929	601295
			Ws8	73	671.315	11.4223	125.562	61.069	1.14223e+06	0.671315	766792
											6.13878e+06
					Watershed	Q (mm)	AREA OF WATERSHED (km2)	Volume (m3)	Capacity of Suitable Locations
					Ws1	671.315	22.0929	1.48313e+06	2.82142e+06
					Ws2	289.29	11.6138	335975	0
					Ws3	310.535	25.7042	798206	150501
					Ws4	270.129	0.309538	8361.51	256015
					Ws5	724.604	27.6449	2.00316e+06	99527.9
					Ws6	236.873	5.98887	141860	3.54085e+06
					Ws7	289.29	20.7852	601295	160418
					Ws8	671.315	11.4223	766792	431147
									2.47494e+06
